# Supplementary material for: NGF Induces Proliferation and Aggressiveness In Prostate Cancer Cells.
Source: Preprints.org preprint supplement (doi:10.20944/preprints201904.0142.v1), 2019-04-11
Supplement: Supplementary file 1 [file supplementary]

## SUPPLEMENTAL DATA

### **Fig. 1 S shows the densitometry analysis of EMT markers expression in CRPC cells.**

Quiescent C4-2B, DU145, and PC3 cells were left untreated or treated for 72h with the indicated compounds. NGF was used at 100ng/ml and GW441756 (GW) at 1  $\mu$ M. Lysate proteins were analyzed by Western blot, using the antibodies against E-cadherin or vimentin. The blots from three different experiments were done and expression levels of E-cadherin and vimentin were analyzed by densitometry, using NIH Image J Software. For each experiment, the ratio E-cadherin/tubulin in C4-2B (**A**), DU145 (**C**) and PC3 (**E**) cells and the ratio vimentin/tubulin in C4-2B (**B**), DU145 (**D**) and PC3 (**F**) cells was evaluated. Results were expressed as fold change. Means and SEMs are shown, *n* represents the number of the experiments. \**p* < 0,05 for the indicated experimental points *versus* the corresponding untreated control.

### **Fig. 2S shows the analysis of organoid size from CRPC cells challenged with NGF.**

Miniaturized 3D C4-2B (**A**), DU145 (**B**) and PC3 (**C**) cultures in ECM were done. The area of organoids was calculated using Leica suite software. For each cell line, 3 different experiments, each in triplicate, were done and results were expressed as fold increase over the basal level analyzed after 4 days. Means and SEMs are shown, *n* represents the number of the experiments. \**p* < 0,05 for the indicated experimental points *versus* the untreated controls.

### **Fig. 3 S shows the densitometry analysis of ERK and Akt activation in CRPC cells.**

Quiescent C4-2B, DU145 and PC3 cells were used. Cells were left unstimulated or stimulated with 100 ng/ml NGF. Lysate proteins were analyzed by Western blot, using the anti p-ERK (P-Tyr 204 ERK 1 and the corresponding phosphorylated ERK 2) or anti p-Akt (P-Ser 473 Akt) antibodies. Filters were re-probed using anti ERK or anti Akt antibodies, as a loading control. Densitometry analysis from 3 different experiments was done using NIH Image J Software. For each experiment, the ratio p-ERK/ERK in C4-2B (**A**), DU145 (**C**) and PC3 (**E**) cells and the ratio p-Akt/Akt in C4-2B (**B**), DU145 (**D**) and PC3 (**F**) cells were evaluated and results expressed as fold change. Means and SEMs are shown, *n* represents the number of the experiments.
