# Supplementary material for: NGF Induces Proliferation and Aggressiveness In Prostate Cancer Cells.
Source: Preprints.org preprint supplement (doi:10.20944/preprints201904.0142.v1), 2019-04-11
Supplement: Supplementary file 2 [file supplementary]

Archive with 4 entries (4 files):
- Fig. 1S Di Donato et al.tif
- Fig. 2S Di Donato et al.tif
- Fig. 3S Di Donato et al.tif
- SUPPLEMENTAL DATA.pdf
