# Supplementary figures and images for: NGF Induces Proliferation and Aggressiveness In Prostate Cancer Cells.
Source: Preprints.org preprint supplement (doi:10.20944/preprints201904.0142.v1), 2019-04-11

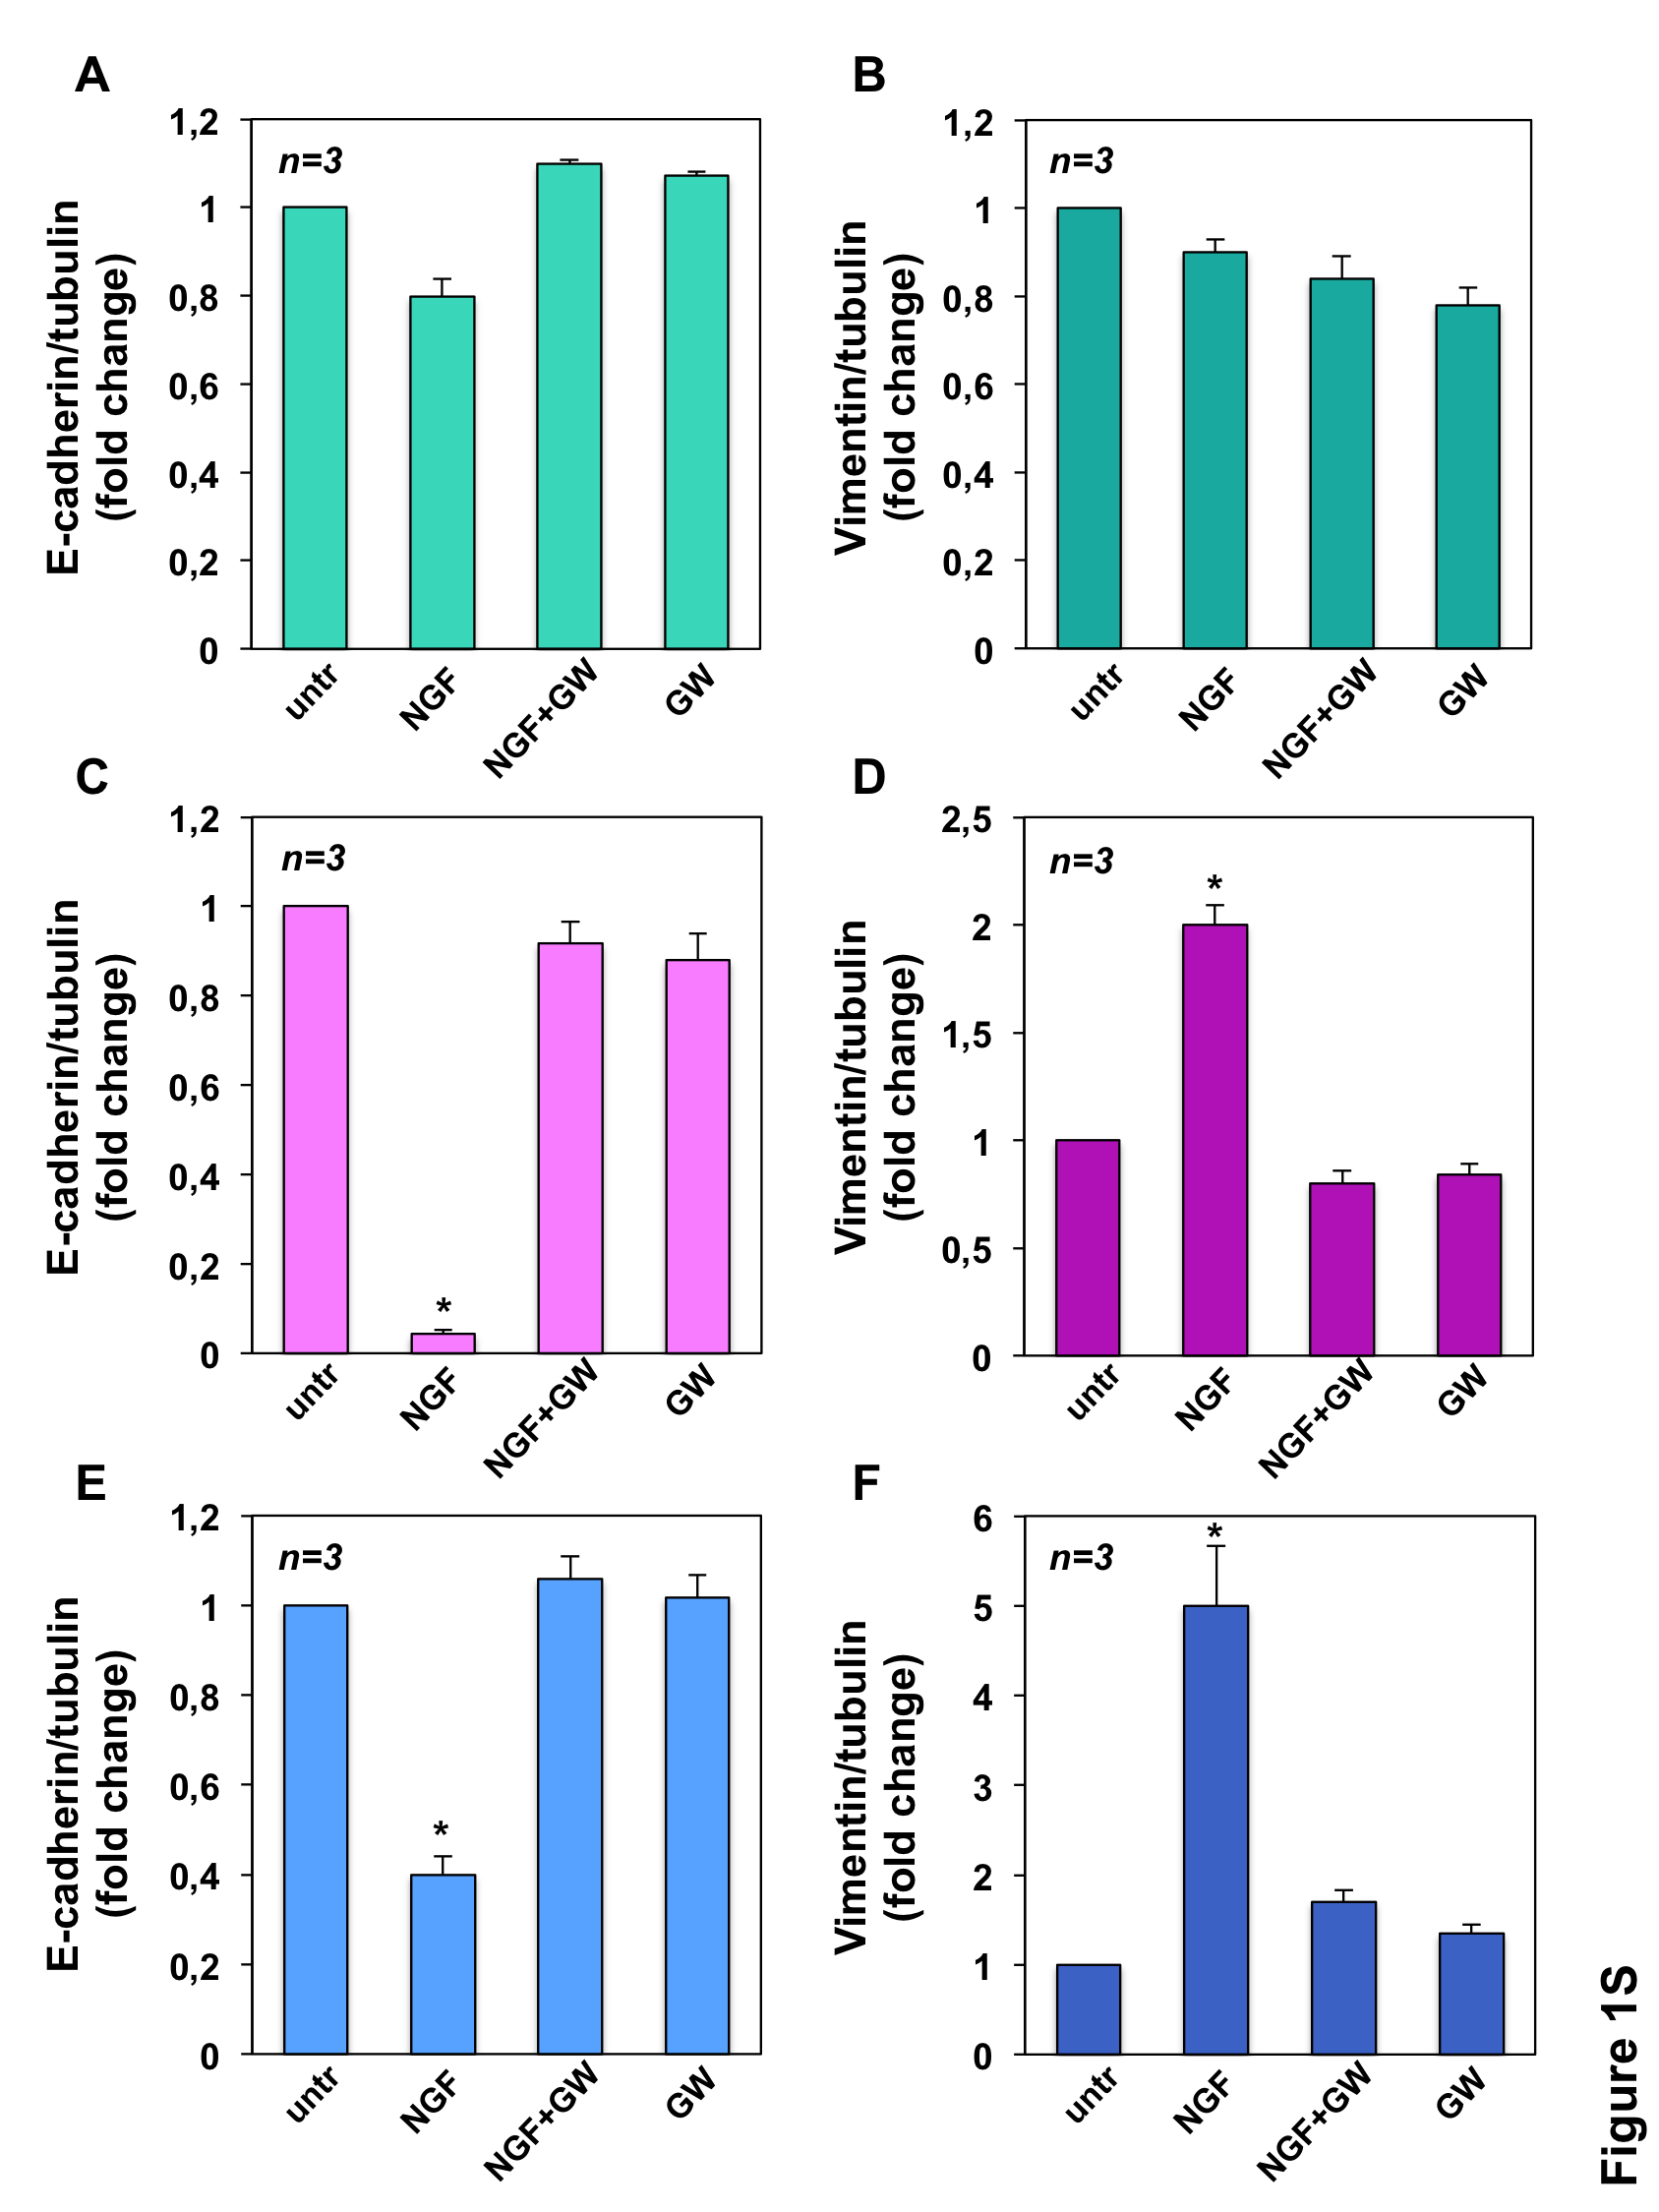

Supplement: Supplementary file 2 [file supplementary › Fig. 1S Di Donato et al.tif]

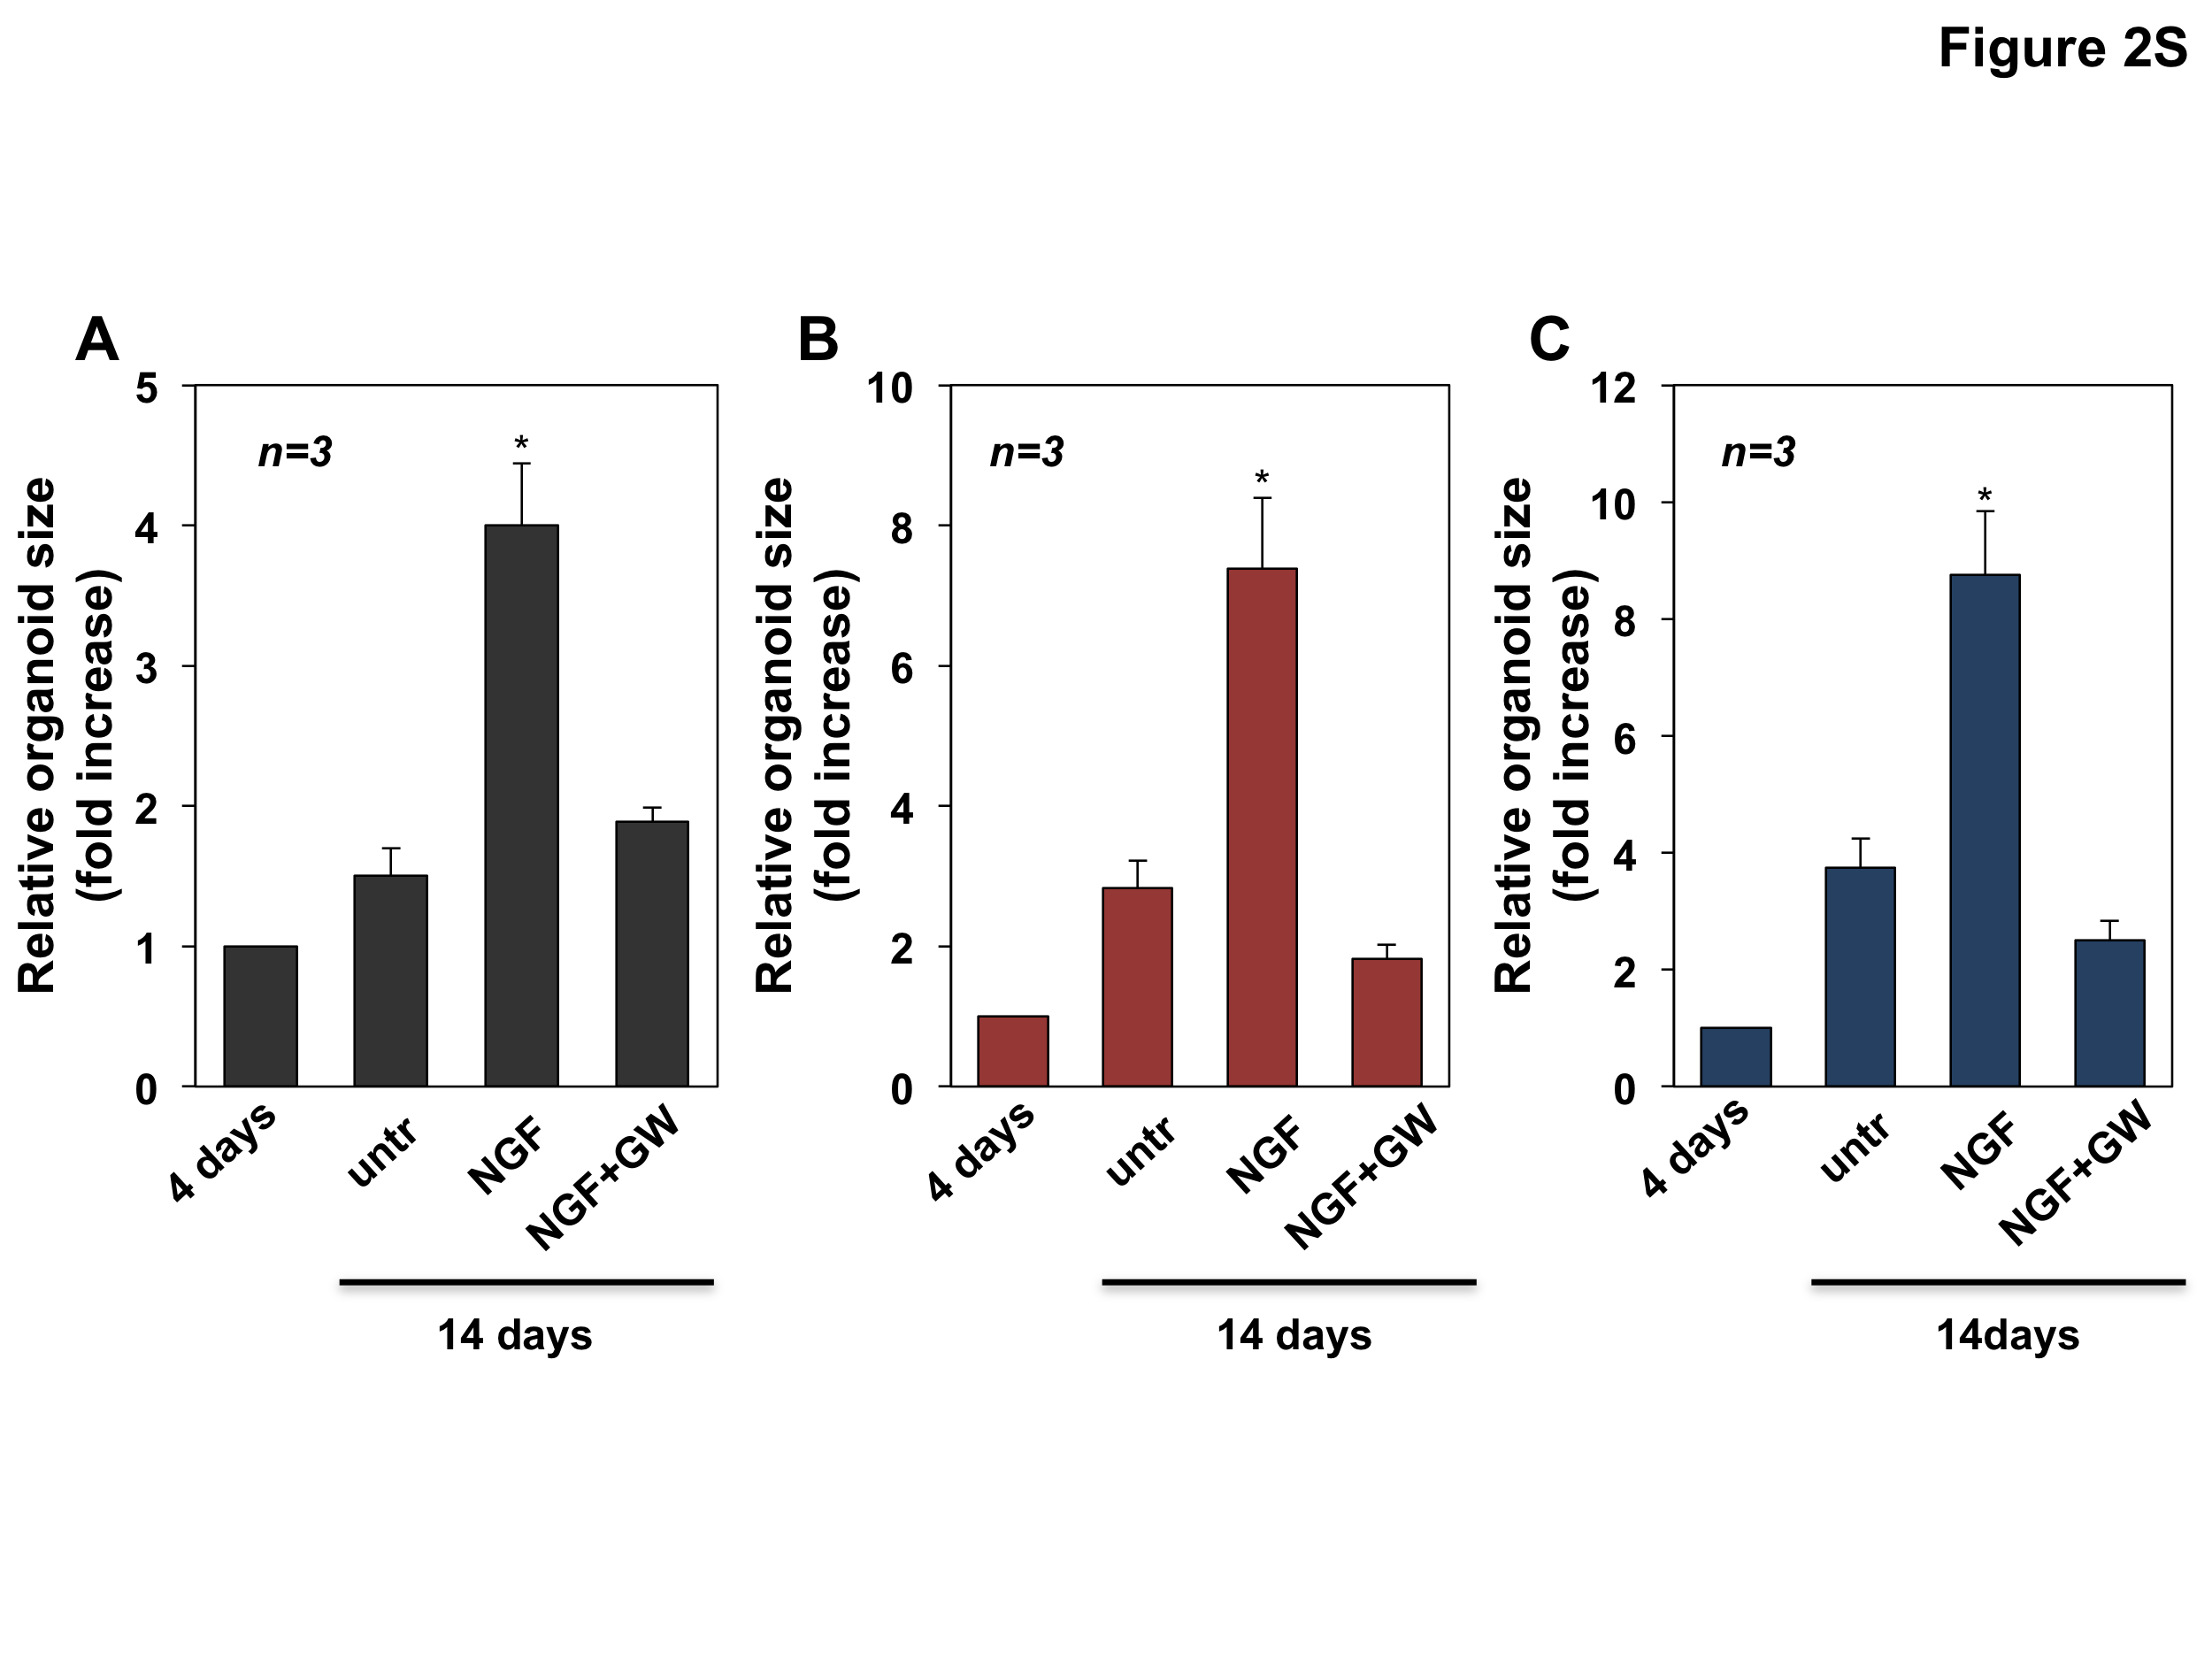

Supplement: Supplementary file 2 [file supplementary › Fig. 2S Di Donato et al.tif]

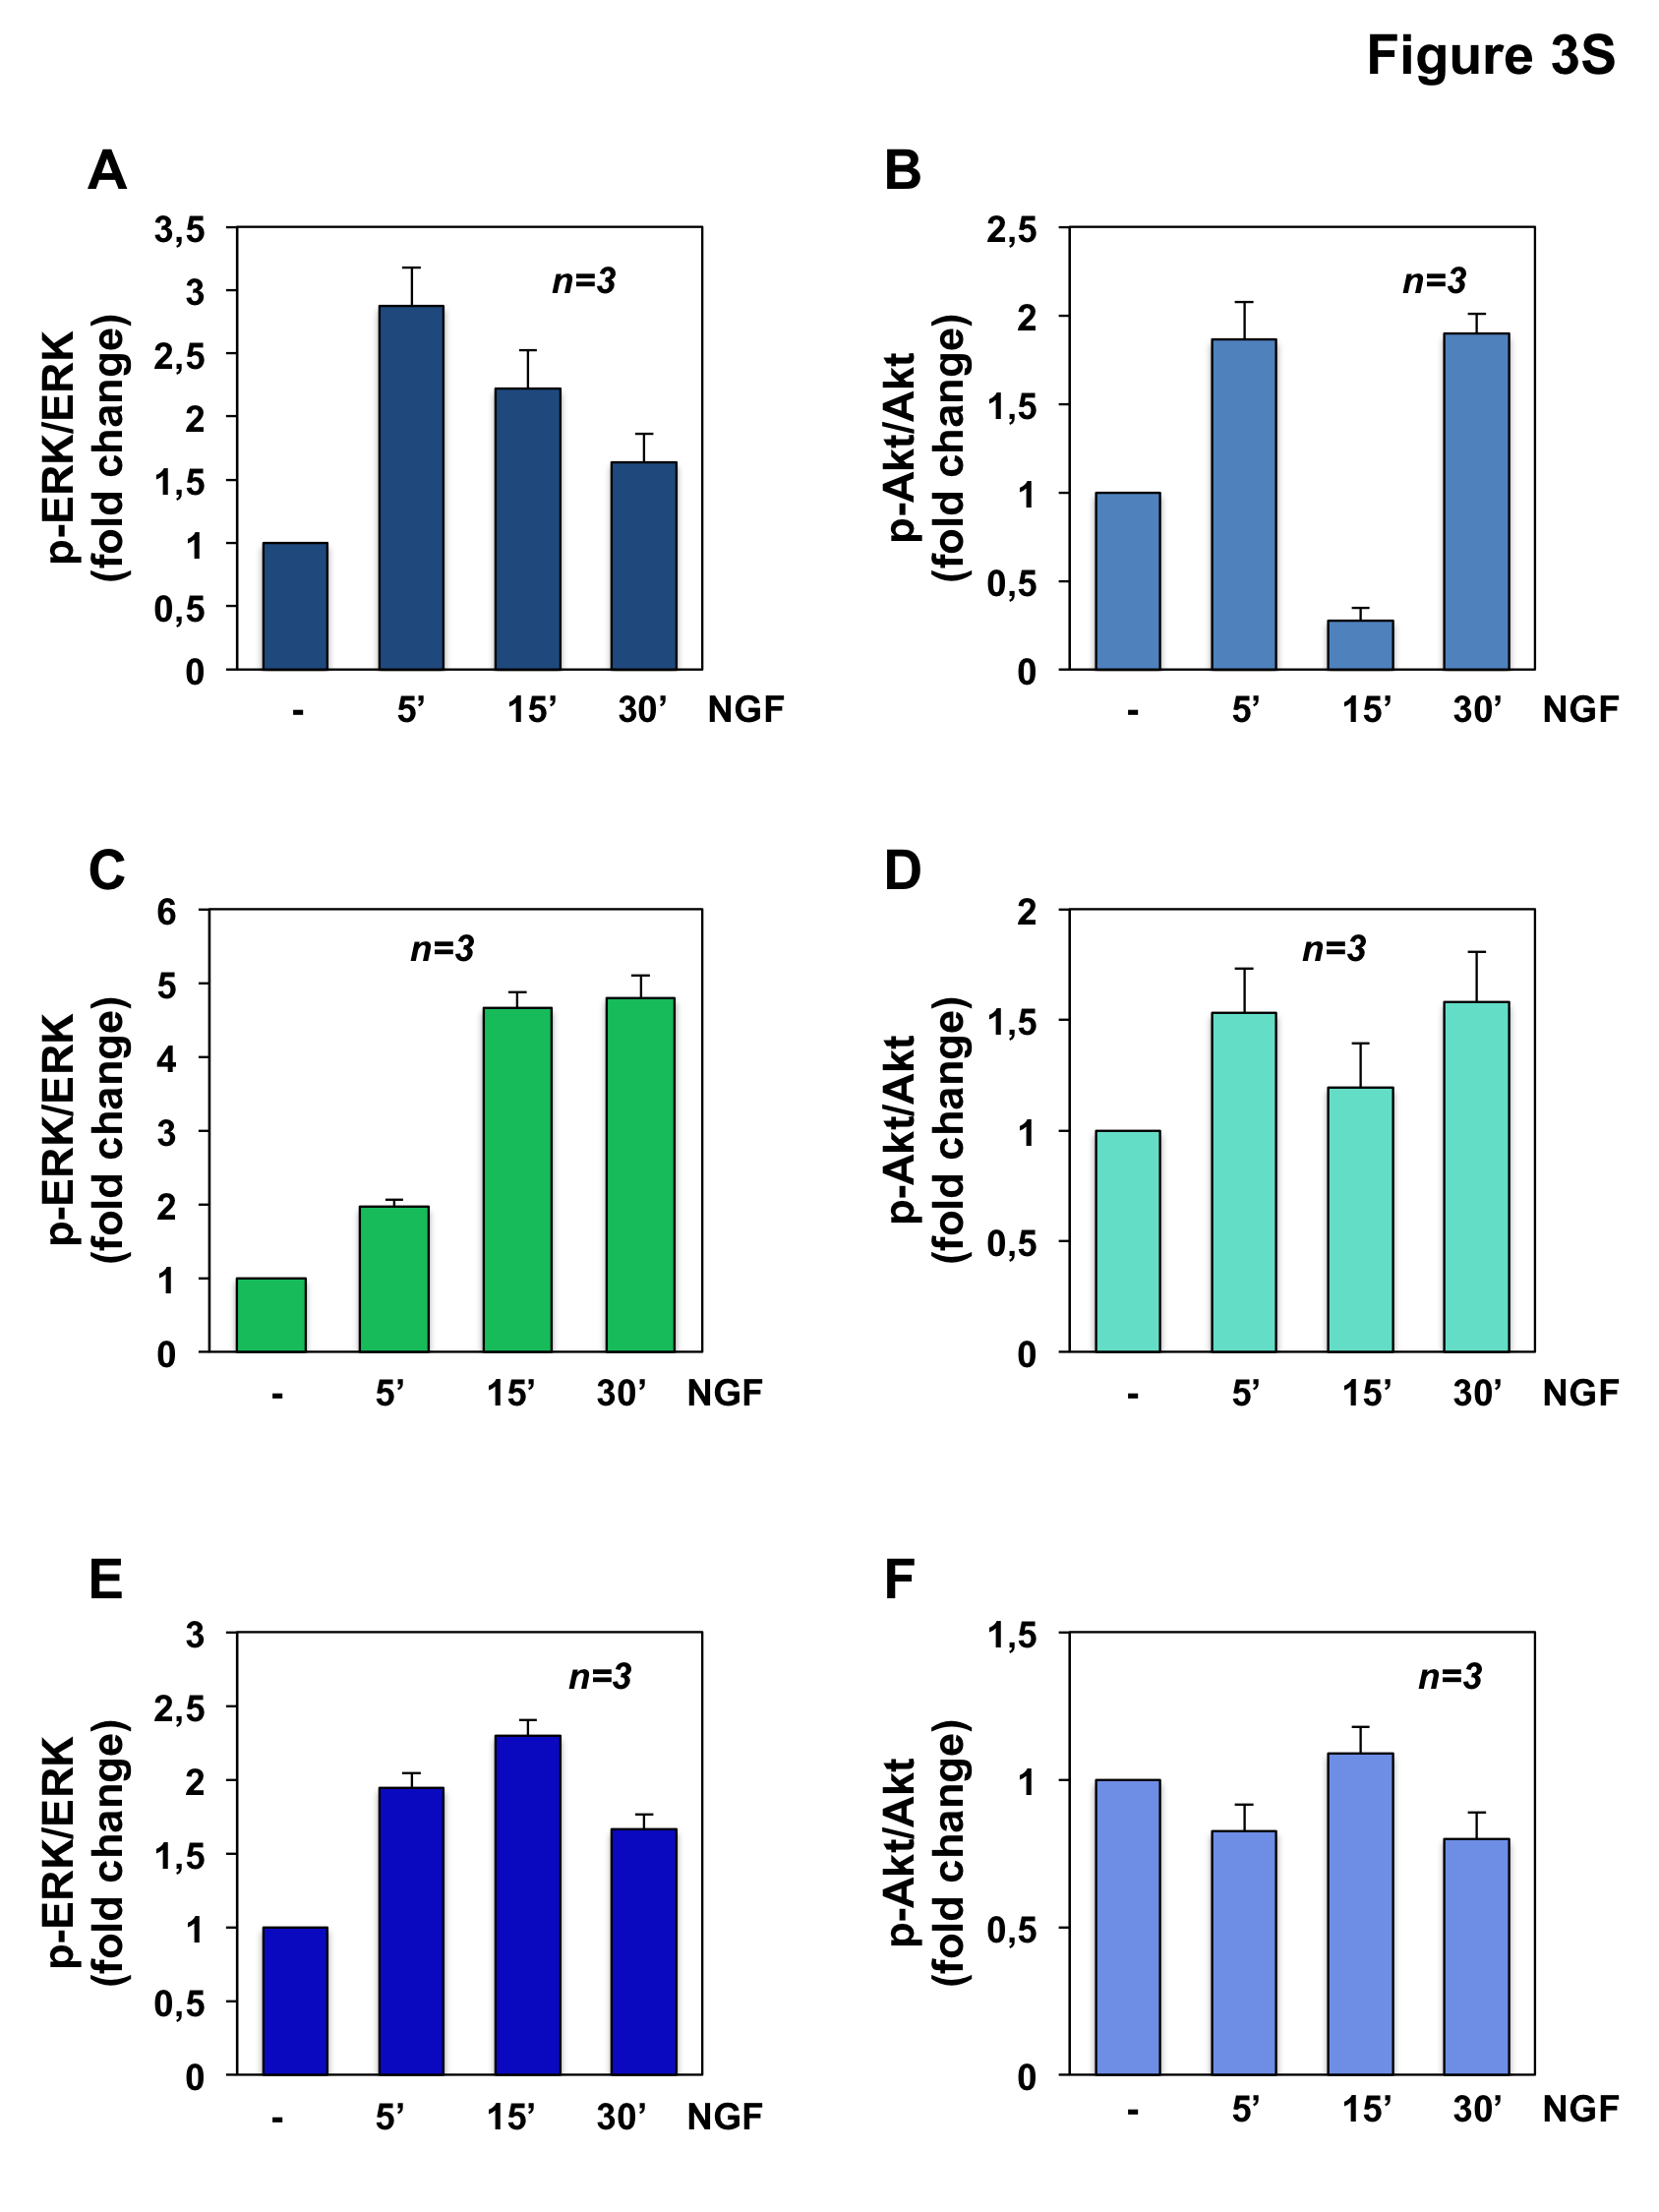

Supplement: Supplementary file 2 [file supplementary › Fig. 3S Di Donato et al.tif]
